# Supplementary material for: Promoting reducibility and activity of Cu by tuning oxygen defects on ceria for selective electrochemical CO2 reduction to methane
Source: Royal Society of Chemistry journal article supplement (doi:10.1039/d4nj01772b), 2024-01-01
Supplement: d4nj01772b1.pdf [file d4nj01772b1.pdf]

## Supporting information

Lingwei Yu<sup>a</sup>, Ying Zhang<sup>a\*</sup>, Leyi Zhou<sup>a</sup>, Yaqi Wang<sup>a</sup>, Xinru Ma<sup>a</sup>, Zhangkun Hou<sup>a</sup>, Leyi Zhou<sup>a</sup>,  
Yaqi Wang<sup>a</sup>, Xinru Ma<sup>a</sup>, Hongchuan Zhang<sup>a</sup>, Sai Xie<sup>a</sup>, Zifeng Yan<sup>a\*</sup>

<sup>a</sup> State Key Laboratory of Heavy Oil Processing, College of Chemistry and Chemical Engineering,  
China University of Petroleum (East China), Qingdao, Shandong 266580, P. R. China.

Email: [yzhang@upc.edu.cn](mailto:yzhang@upc.edu.cn); [zfyan@upc.edu.cn](mailto:zfyan@upc.edu.cn)

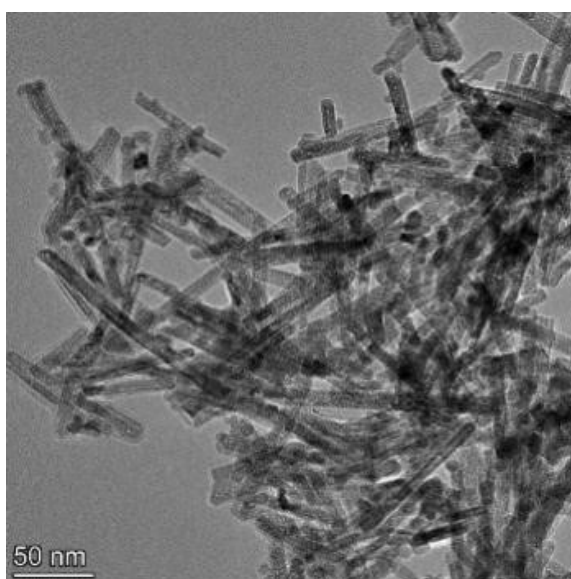

Fig. S1 TEM image of Cu-CeO<sub>2</sub>.

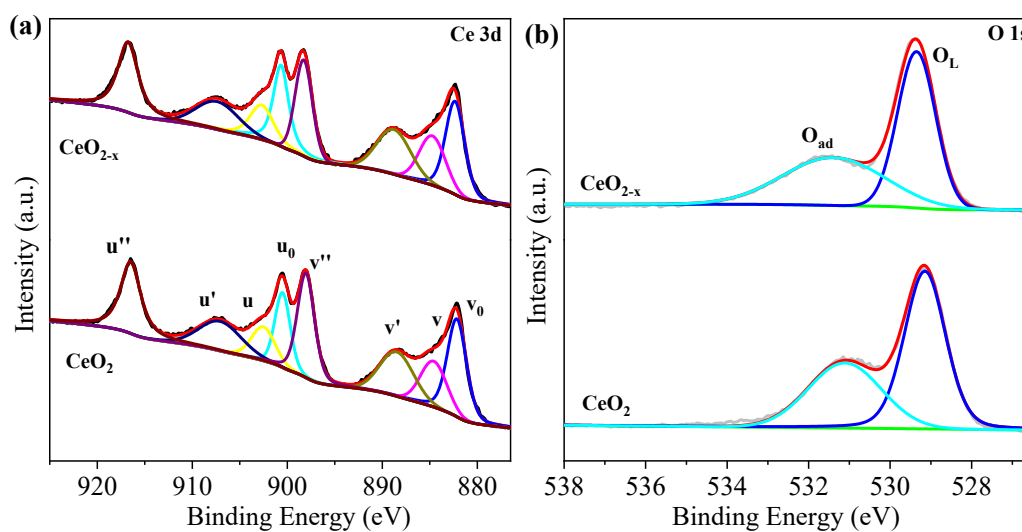

Fig. S2 (a) Ce3d spectra of CeO<sub>2</sub> and CeO<sub>2-x</sub>. (b) O1s spectra of CeO<sub>2</sub> and CeO<sub>2-x</sub>.

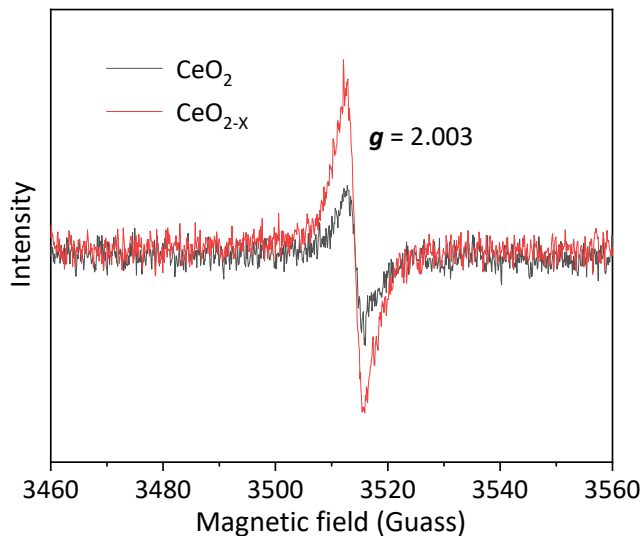

**Fig. S3** EPR spectra of  $\text{CeO}_2$  and  $\text{CeO}_{2-x}$

**Table. S1** XPS analysis of  $\text{CeO}_2$  and  $\text{CeO}_{2-x}$

| Sample                                                            | $\text{CeO}_2$ | $\text{CeO}_{2-x}$ |
|-------------------------------------------------------------------|----------------|--------------------|
| $\text{Ce}^{3+}/\text{Ce}^{4+}$                                   | 0.80           | 0.93               |
| $\text{O}_{\text{ad}}/(\text{O}_{\text{ad}}+\text{O}_{\text{L}})$ | 0.40           | 0.47               |

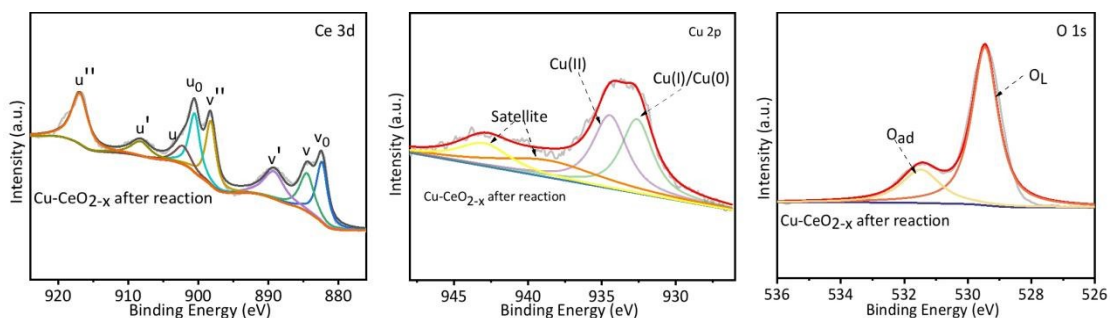

**Fig. S4** Ce3d spectra, Cu2p spectra and O1s spectra of  $\text{Cu-CeO}_{2-x}$  after reaction

**Table. S2** XPS analysis of  $\text{Cu-CeO}_{2-x}$  and  $\text{Cu-CeO}_{2-x}$  after reaction

| Sample                                                            | $\text{Cu-CeO}_{2-x}$ | $\text{Cu-CeO}_{2-x}$ after reaction |
|-------------------------------------------------------------------|-----------------------|--------------------------------------|
| $\text{Ce}^{3+}/\text{Ce}^{4+}$                                   | 0.59                  | 0.58                                 |
| $\text{O}_{\text{ad}}/(\text{O}_{\text{ad}}+\text{O}_{\text{L}})$ | 0.41                  | 0.40                                 |
| $(\text{Cu}^0+\text{Cu}^+)/\text{Cu}$                             | 0.84                  | 0.87                                 |

**Table S3** The performance of various Cu-MO<sub>x</sub> catalysts for CO<sub>2</sub> electrochemical reduction

| Catalyst                             | Production      | Faradic efficiency | Potential       | Current density          | Electrolyte             | Reference |
|--------------------------------------|-----------------|--------------------|-----------------|--------------------------|-------------------------|-----------|
| Cu-CeO <sub>2-x</sub>                | CH <sub>4</sub> | 52.7%              | -1.8 V vs. RHE  | 24.2 mA cm <sup>-2</sup> | 0.1 M KHCO <sub>3</sub> | This work |
| Cu-CeO <sub>2</sub> -4%              | CH <sub>4</sub> | 58%                | -1.8 V vs. RHE  | 28 mA cm <sup>-2</sup>   | 0.1 M KHCO <sub>3</sub> | 1         |
| Cu/CeO <sub>2</sub> -R               | CH <sub>4</sub> | 49.3%              | -1.6 V vs. RHE  | 16.8 mA cm <sup>-2</sup> | 0.1 M KHCO <sub>3</sub> | 2         |
| 5-CuO/CeO <sub>2</sub>               | CH <sub>4</sub> | 37.8%              | -1.27 V vs. RHE | 22 mA cm <sup>-2</sup>   | 0.1 M KHCO <sub>3</sub> | 3         |
| Cu/CeO <sub>2</sub>                  | CH <sub>4</sub> | 42%                | -0.89 V vs. RHE | 51 mA cm <sup>-2</sup>   | 1 M KOH                 | 4         |
| Cu <sub>0.04</sub> /CeO <sub>2</sub> | CH <sub>4</sub> | 58%                | -1.3 V vs. RHE  | 7 mA cm <sup>-2</sup>    | 0.1 M KHCO <sub>3</sub> | 5         |
| Cu@ZnO                               | CH <sub>4</sub> | 52%                | -1.4 V vs. RHE  | 7 mA cm <sup>-2</sup>    | 0.1 M KHCO <sub>3</sub> | 6         |

## References

1. Y. Wang, Z. Chen, P. Han, Y. Du, Z. Gu, X. Xu and G. Zheng, *Acs Catal.*, 2018, **8**, 7113-7119.
2. L. Xue, C. Zhang, J. Wu, Q.-Y. Fan, Y. Liu, Y. Wu, J. Li, H. Zhang, F. Liu and S. Zeng, *Appl. Catal. B-Environ.*, 2022, **304**, 120951.
3. H. D. Cai, B. Nie, P. Guan, Y. S. Cheng, X. D. Xu, F. H. Wu, G. Yuan and X. W. Wei, *ACS Appl. Nano Mater.*, 2022, **5**, 7259-7267.
4. A. Guan, Z. Chen, Y. Quan, C. Peng, Z. Wang, T.-K. Sham, C. Yang, Y. Ji, L. Qian, X. Xu and G. Zheng, *ACS Energy Lett.*, 2020, **5**, 1044-1053.
5. J. Yin, Z. Gao, F. Wei, C. Liu, J. Gong, J. Li, W. Li, L. Xiao, G. Wang, J. Lu and L. Zhuang, *ACS Catal.*, 2022, **12**, 1004-1011.
6. W. J. Jang, H. M. Kim, J. O. Shim, S. Y. Yoo, K. W. Jeon, H. S. Na, Y. L. Lee, D. W. Jeong, J. W. Bae, I. W. Nah and H. S. Roh, *Green Chem.*, 2018, **20**, 1621-1633.
